# Supplementary material for: Homeostatic synaptic plasticity of miniature excitatory postsynaptic currents in mouse cortical cultures requires neuronal Rab3a
Source: eLife. 2025 Oct 14;12:RP90261. doi: 10.7554/eLife.90261 (PMC12520659; doi:10.7554/eLife.90261)
Supplement: Figure 1—source data 1. [file elife-90261-fig1-data1.xlsx]

## Sheet: WT Amplitude
Untreated					TTX Treated
Cell Name	Amplitude (pA)	Group	Mean	SEM	Cell Name	Amplitude (pA)	Group	Mean	SEM
C0508004o	15	1	13.85	0.66	A0311002ofull	17.9	2	18.17	0.93
C0508000o	10.8	1			C0508002o	27.6	2
C0322000o	14.6	1			C0220020o	17.2	2
C0220006o	14.6	1			C0220017o	8.9	2
C0220000o	7.39	1			B0531004o	22.5	2
B0531006o	14.1	1			A0405006o	18.6	2
B0531001o	10.8	1			A0405005o	17	2
B0531000o	15.7	1			A0314014o	18.8	2
A0405003o	14.5	1			A0314012o	22.2	2
A0405002o	17.6	1			A0314007o	19.2	2
A0314013o	11	1			A0302016o	12.8	2
A0314004o	19.5	1			A0302015o	22	2
A0314003o	19.1	1			A0302011o	19.2	2
A0314001o	7.67	1			A0824003o	17.6	2
A0302013o	17.8	1			A0824002o	10.7	2
A0302010o	18.8	1			A0824001o	13.9	2
A0302009o	21.4	1			A0330003o	22.1	2
A0302006o	10.2	1			A0330002o	14	2
A0824005o	11.7	1			A0311009o	22.7	2
A0824004o	10.2	1			A0311008o	14.8	2
A0824000o	10.9	1			A0311005o	19.9	2
A0330000o	11.5	1			A0311004o	14.9	2
A0330005o	17.5	1			A0222003o	23.5	2
A0330004o	13.4	1
A0311007o	9.74	1
A0311006o	13.1	1
A0311001o	10.8	1
A0222004o	14.3	1
A0222002o	16.4	1
A0222000o	15.5	1

## Sheet: WT Frequency
Untreated					TTX Treated
Cell Name	Frequency (sec-1)	Group	Mean	SEM	Cell Name	Frequency (sec-1)	Group	Mean	SEM
C0508004o	7.88	1	2.26	0.36663	A0311002ofull	5.08	2	4.62	0.74453
C0508000o	2.92	1			C0508002o	9.11	2
C0322000o	2.03	1			C0220020o	13.18	2
C0220006o	2.2	1			C0220017o	1.23	2
C0220000o	0.46	1			B0531004o	10.12	2
B0531006o	1.35	1			A0405006o	1.01	2
B0531001o	0.43	1			A0405005o	3.95	2
B0531000o	7.65	1			A0314014o	7.9	2
A0405003o	5.1	1			A0314012o	2.01	2
A0405002o	4.59	1			A0314007o	5.7	2
A0314013o	1.34	1			A0302016o	2.29	2
A0314004o	4.68	1			A0302015o	9.09	2
A0314003o	1.44	1			A0302011o	9.85	2
A0314001o	0.35	1			A0824003o	0.46	2
A0302013o	1.21	1			A0824002o	1.25	2
A0302010o	2.64	1			A0824001o	2.19	2
A0302009o	1.66	1			A0330003o	3.92	2
A0302006o	0.95	1			A0330002o	2.48	2
A0824005o	1.11	1			A0311009o	2.65	2
A0824004o	0.67	1			A0311008o	3.83	2
A0824000o	0.88	1			A0311005o	1.53	2
A0330000o	0.61	1			A0311004o	2.18	2
A0330005o	1	1			A0222003o	5.31	2
A0330004o	2.58	1
A0311007o	1.96	1
A0311006o	1.46	1
A0311001o	0.61	1
A0222004o	0.74	1
A0222002o	4.18	1
A0222000o	3.23	1

## Sheet: KO Amplitude
Untreated					TTX Treated
Cell Name	Amplitude (pA)	Group	Mean	SEM	Cell Name	Amplitude (pA)	Group	Mean	SEM
A0823001ofull2	11.8	1	13.55	0.73485	B1116008ofull	11.2	2	14.34	0.61463
B0629000ofull	8.84	1			C0213007o	12.9	2
C0213004o	14.8	1			C0507009o	14.9	2
C0507000o	11.2	1			C0326009o	13.4	2
C0326004o	15.3	1			C0326006o	14.7	2
B1118001o	8.6	1			C0326002o	17.6	2
B1118008o	10.9	1			B1118007o	11.1	2
B1118003o	19.7	1			B1118006o	9.07	2
B1118000o	14.2	1			B1118005o	11	2
B1116003o	15.4	1			B1118004o	9.23	2
B1116001o	17.2	1			B1116007o	14.6	2
B1116000o	18.2	1			B1116004o	13.6	2
B0629008o	18.7	1			B0629009o	15.8	2
B0413010o	14.1	1			B0629006o	19.6	2
B0413003o	21.1	1			B0629004o	17.6	2
B0413000o	18.6	1			B0413013o	14.1	2
A0823000o	11.1	1			B0413007o	16.9	2
A0810003o	12.9	1			B0413004o	14.2	2
A0810000o	13.4	1			A0823007o	13.2	2
A0803008o	11.5	1			A0810004o	19.6	2
A0803003o	11.5	1			A0803013o	20	2
A0803001o	8.38	1			A0803010o	16.2	2
A0731004o	10.8	1			A0803006o	15	2
A0731001o	9.68	1			A0803005o	14.5	2
A0731000o	10.9	1			A0803004o	14.3	2
					A0731002o	8.55	2

## Sheet: KO Frequency
Untreated					TTX Treated
Cell Name	Frequency (sec-1)	Group	Mean	SEM	Cell Name	Frequency (sec-1)	Group	Mean	SEM
A0823001ofull2	0.93	1	2.74	0.49066	B1116008ofull	0.62	2	3.23	0.92977
B0629000ofull	0.63	1			C0213007o	0.99	2
C0213004o	2.21	1			C0507009o	0.49	2
C0507000o	0.45	1			C0326009o	2.77	2
C0326004o	1.04	1			C0326006o	0.78	2
B1118001o	2.67	1			C0326002o	1.32	2
B1118008o	0.72	1			B1118007o	0.79709	2
B1118003o	2.27	1			B1118006o	0.64078	2
B1118000o	3.48	1			B1118005o	0.99294	2
B1116003o	2.68	1			B1118004o	4.19	2
B1116001o	2.85	1			B1116007o	0.71896	2
B1116000o	9.19	1			B1116004o	1.68	2
B0629008o	7.8	1			B0629009o	1.15	2
B0413010o	7.21	1			B0629006o	16.4	2
B0413003o	5.11	1			B0629004o	0.64717	2
B0413000o	5.16	1			B0413013o	13.14	2
A0823000o	0.82	1			B0413007o	11.78	2
A0810003o	0.55	1			B0413004o	14.01	2
A0810000o	4.13	1			A0823007o	0.35	2
A0803008o	2.35	1			A0810004o	1.32	2
A0803003o	0.77	1			A0803013o	0.63	2
A0803001o	1.36	1			A0803010o	0.82	2
A0731004o	0.58	1			A0803006o	1.12	2
A0731001o	2.67	1			A0803005o	2.1	2
A0731000o	0.8	1			A0803004o	3.13	2
					A0731002o	1.43	2
