# Supplementary material for: Homeostatic synaptic plasticity of miniature excitatory postsynaptic currents in mouse cortical cultures requires neuronal Rab3a
Source: eLife. 2025 Oct 14;12:RP90261. doi: 10.7554/eLife.90261 (PMC12520659; doi:10.7554/eLife.90261)
Supplement: Figure 2—source data 1. [file elife-90261-fig2-data1.xlsx]

## Sheet: WT (EBD colony) Amplitude
Untreated					TTX Treated
Cell Name	Amplitude (pA)	Group	Mean	SEM	Cell Name	Amplitude (pA)	Group	Mean	SEM
B0830000	9.01	1	10.99	0.58526	B0830005	15.37	2	15.09	1.24816
B0830001	6.93	1			B0830006	29.98	2
B0830004	8.22	1			B0830009	15.29	2
B0927000	10.17	1			B0830010	11.51	2
B0927001	14.74	1			B0927002	19.49	2
B0927004	13.2	1			B0927003	26.15	2
B1107000	8.44	1			B0927005	10.23	2
B1107001	14.54	1			B0927006	23.48	2
B1107005	9.82	1			B0927007	11.32	2
C0130000	7.26	1			B1107002 & 3	12.57	2
C0130001	14	1			B1107004	12.96	2
C0130002	9.23	1			B1107006	10.3	2
C0130007	10.66	1			B1107007	16.35	2
C0229000	12.27	1			B1107008	11.12	2
C0229001	7.94	1			C0130003	10.03	2
C0229005	11.72	1			C0130004	11.06	2
C0229006	10.45	1			C0130005	12.12	2
C0321000	14.49	1			C0130008	11.09	2
C0321002	13.99	1			C0229002	16.31	2
C0321004	12.66	1			C0229004	12.58	2
					C0229008	8.16	2
					C0321005	13.21	2
					C0321006	26.34	2

## Sheet: WT (EBD colony) Frequency
Untreated					TTX Treated
Cell Name	Frequency (sec-1)	Group	Mean	SEM	Cell Name	Frequency (sec-1)	Group	Mean	SEM
B0830000	0.32	1	1.15	0.18941	B0830005	5.56	2	2.54	0.54899
B0830001	0.25	1			B0830006	9.56	2
B0830004	0.59	1			B0830009	7.24	2
B0927000	0.42	1			B0830010	3.38	2
B0927001	0.58	1			B0927002	1.86	2
B0927004	1.15	1			B0927003	0.62589	2
B1107000	3.09	1			B0927005	0.28681	2
B1107001	0.73	1			B0927006	2.44	2
B1107005	0.71	1			B0927007	0.39901	2
C0130000	1.38	1			B1107002 & 3	1.05	2
C0130001	2.9	1			B1107004	1.76	2
C0130002	0.33	1			B1107006	1.64	2
C0130007	0.49	1			B1107007	2.42	2
C0229000	0.83	1			B1107008	0.49479	2
C0229001	1.45	1			C0130003	6.02	2
C0229005	1.76	1			C0130004	0.8	2
C0229006	1.15	1			C0130005	0.65	2
C0321000	2.49	1			C0130008	0.42	2
C0321002	0.89	1			C0229002	1.1	2
C0321004	1.57	1			C0229004	2.19	2
					C0229008	0.3	2
					C0321005	1.41	2
					C0321006	6.78	2

## Sheet: EBD Amplitude
Untreated					TTX Treated
Cell Name	Amplitude (pA)	Group	Mean	SEM	Cell Name	Amplitude (pA)	Group	Mean	SEM
A0323001	13.93	1	15.14	0.99475	A0323004	28.69	2	14.64	1.05531
A0323003	12.92	1			A0323005	16.18	2
A0323008	24.88	1			A0323006 & 7	10.21	2
A0323009	11.65	1			A0323010	18.6	2
A0920001	13.27	1			A0323011	21.12	2
A0920006	9.9	1			A0920005	14.93	2
A0920007	11.17	1			A0920008	8.24	2
A1027000	12.95	1			A0920009	12.78	2
A1027001	12.4	1			A1027002	13.7	2
A1027004	12.37	1			A1027003	16.21	2
A1027005	16.04	1			A1027006	9.73	2
A1027009	14.31	1			A1027007	11.79	2
A0221001	20.91	1			A1027008	8.69	2
A0221002	12.33	1			A0221006	18.88	2
A0404009	13.43	1			A0404007	14.63	2
A0404011	27.25	1			A0404012	13.33	2
B0505000	13.62	1			A0404014	12.61	2
B0505004	17.47	1			A0404015	17.15	2
B0505005	11.67	1			B0505007	9.79	2
B0601002	19.9618	1			B0601003	9.89962	2
B0601006	15.5565	1			B0601004	21.3166	2
					B0601008	13.5109	2

## Sheet: EBD Frequency
Untreated					TTX Treated
Cell Name	Frequency (sec-1)	Group	Mean	SEM	Cell Name	Frequency (sec-1)	Group	Mean	SEM
A0323001	1.11	1	1.71	0.40679	A0323004	14.77	2	3.05	0.80059
A0323003	0.67	1			A0323005	7.14	2
A0323008	4.28	1			A0323006 & 7	0.23	2
A0323009	0.82	1			A0323010	9.06	2
A0920001	0.77	1			A0323011	7.29	2
A0920006	2.3	1			A0920005	3.08	2
A0920007	1.07	1			A0920008	0.21	2
A1027000	1	1			A0920009	1.28	2
A1027001	0.58	1			A1027002	0.79	2
A1027004	0.72	1			A1027003	0.52	2
A1027005	0.93	1			A1027006	1.35	2
A1027009	2.68	1			A1027007	0.48	2
A0221001	8.5	1			A1027008	0.2	2
A0221002	0.85	1			A0221006	4.34	2
A0404009	2.72	1			A0404007	5.73	2
A0404011	1.96	1			A0404012	1.31	2
B0505000	0.4	1			A0404014	0.65	2
B0505004	0.77	1			A0404015	3.46	2
B0505005	0.28	1			B0505007	0.31	2
B0601002	2.81	1			B0601003	0.27308	2
B0601006	0.75	1			B0601004	3.98	2
					B0601008	0.64771	2
