# Supplementary material for: Homeostatic synaptic plasticity of miniature excitatory postsynaptic currents in mouse cortical cultures requires neuronal Rab3a
Source: eLife. 2025 Oct 14;12:RP90261. doi: 10.7554/eLife.90261 (PMC12520659; doi:10.7554/eLife.90261)
Supplement: Figure 3—source data 1. [file elife-90261-fig3-data1.xlsx]

## Sheet: PreNASPMAmp
	CON					TTX
Cell Name	Amplitude (pA)	Group	Mean	SEM	Cell Name	Amplitude (pA)	Group	Mean	SEM
D0820000	19.3263	1	12.9369	1.06659	D0820005	15.2256	2	17.5499	0.93263
D0820009	11.4486	1			D0820019	18.1203	2
D0820031	15.4765	1			D0820027	22.0354	2
D0822000	9.30824	1			D0822004	20.2932	2
D0822007	9.70546	1			D0822011	15.4406	2
D0822015	11.1936	1			D0822019	14.2468	2
D0822023	18.596	1			D0822027	18.6098	2
D0822031	10.8037	1			D0822035	14.0476	2
D0822039	9.6593	1			D0822043	22.239	2
E0303000	12.5994	1			E0303004	14.2855	2
E0303018	14.1886	1			E0303013	18.5049	2

## Sheet: PostNASPMamp
	CON					TTX
Cell Name	Amplitude (pA)	Mean	SEM	Group	Cell Name	Amplitude (pA)	Group	Mean	SEM
D0820000	16.0402	11.8712	0.7854	1	D0820005	17.0408	2	16.1373	1.04505
D0820009	9.48512			1	D0820019	16.1859	2
D0820031	16.1427			1	D0820027	15.5049	2
D0822000	9.46212			1	D0822004	21.1902	2
D0822007	8.82834			1	D0822011	12.0434	2
D0822015	12.647			1	D0822019	11.314	2
D0822023	13.95			1	D0822027	18.8648	2
D0822031	10.2212			1	D0822035	11.8876	2
D0822039	10.1035			1	D0822043	20.7737	2
E0303000	11.2597			1	E0303004	14.5816	2
E0303018	12.4435			1	E0303013	18.1229	2

## Sheet: PreNASPMfreq
	CON					TTX
Cell Name	Frequency (sec-1)	Mean	SEM	Group	Cell Name	Frequency (sec-1)	Group	Mean	SEM
D0820000	6.37	1.84	0.54942	1	D0820005	1.66	2	4.40182	1.05866
D0820009	0.54			1	D0820019	2.61	2
D0820031	4.24			1	D0820027	8.96	2
D0822000	1.43			1	D0822004	7.63	2
D0822007	1.23			1	D0822011	10.24	2
D0822015	0.69			1	D0822019	1.68	2
D0822023	1.56			1	D0822027	7.12	2
D0822031	1.01			1	D0822035	4.69	2
D0822039	0.69			1	D0822043	0.79	2
E0303000	0.71			1	E0303004	0.35	2
E0303018	1.77			1	E0303013	2.69	2

## Sheet: PostNASPMfreq
	CON					TTX
Cell Name	Frequency (sec-1)	Mean	SEM	Group	Cell Name	Frequency (sec-1)	Group	Mean	SEM
D0820000	5.91	1.56091	0.52558		D0820005	1.22	2	2.68091	0.67993
D0820009	0.51				D0820019	3.35	2
D0820031	3.95				D0820027	7.31	2
D0822000	1.36				D0822004	5.6	2
D0822007	0.67				D0822011	3.08	2
D0822015	0.48				D0822019	0.78	2
D0822023	1.04				D0822027	4.04	2
D0822031	0.73				D0822035	2.1	2
D0822039	0.7				D0822043	0.63	2
E0303000	0.68				E0303004	0.35	2
E0303018	1.14				E0303013	1.03	2
