# Supplementary material for: Homeostatic synaptic plasticity of miniature excitatory postsynaptic currents in mouse cortical cultures requires neuronal Rab3a
Source: eLife. 2025 Oct 14;12:RP90261. doi: 10.7554/eLife.90261 (PMC12520659; doi:10.7554/eLife.90261)
Supplement: Figure 5—source data 1. [file elife-90261-fig5-data1.xlsx]

## Sheet: BycultureAmpMeanswithAllmEPSCs
Culture 1	CON			TTX			Culture 2	CON			TTX			Culture 3	CON			TTX
Cell Name	Amplitude (pA)	Mean	Cell Name	Amplitude (pA)	Mean		Cell Name	Amplitude (pA)	Mean	Cell Name	Amplitude (pA)	Mean		Cell Name	Amplitude (pA)	Mean	Cell Name	Amplitude (pA)	Mean
E0414000	10.9	14.1717	E0414002	14	15.9286		D0512003	10.8	13.7557	D0512008	23.7	17.6625		E0519000	15.3	13.421	E0519005	12.3	15.7111
E0414001	16.5		E0414003	13.9			D0512004	25.3		D0512009	15			E0519001	18		E0519006	13.7
E0414004	12.2		E0414007	13.5			D0512005	9.75		D0512010	11			E0519002	9.91		E0519007	14.6
E0414005	7.43		E0414008	12.7			D0512006	12.2		D0512011	10.7			E0519003	13.5		E0519008	21.2
E0414006	24.8		E0414009	27.2			D0512007	16.7		D0512012	17.1			E0519004	10		E0519013	19.6
E0414012	13.2		E0414010	15			D0512017	13.3		D0512013	18.2			E0519010	12.9		E0519014	15.4
			E0414013	15.2			D0512018	8.24		D0512015	23.3			E0519011	14.1		E0519015	16.7
										D0512016	22.3			E0519012	16.3		E0519019	13
														E0519016	12.7		E0519020	14.9
														E0519017	11.5

## Sheet: BycultureAreaMeans
Culture 1	CON			TTX			Culture 2	CON			TTX			Culture 3	CON			TTX			Culture 4	CON			TTX			Culture 5	CON			TTX
Cell Name	Area (mm2)	Mean	Cell Name	Area (mm2)	Mean		Cell Name	Area (mm2)	Mean	Cell Name	Area (mm2)	Mean		Cell Name	Area (mm2)	Mean	Cell Name	Area (mm2)	Mean		Cell Name	Area (mm2)	Mean	Cell Name	Area (mm2)	Mean		Cell Name	Area (mm2)	Mean	Cell Name	Area (mm2)	Mean
Apr_18_14_Cell11	0.82232	0.73412	Apr_18_14_Cell01	1.43387	0.88554		May_16_13_Cell_06	0.66695		May_16_13_Cell_01	0.27927			May_27_14_Cell11	1.23	1.0451	May_27_14_Cell01	0.666	0.95133		Dec_05_13_Cell11	1.04	0.8854	Dec_05_13_Cell01	0.79	0.9525		Oct_11_13_Cell11	0.435	0.5778	Oct_11_13_Cell01	0.803	0.7126
Apr_18_14_Cell12	0.6787		Apr_18_14_Cell02	0.54575			May_16_13_Cell_07	1.07733		May_16_13_Cell_02	1.71469			May_27_14_Cell12	1.29		May_27_14_Cell02	0.872			Dec_05_13_Cell12	1.02		Dec_05_13_Cell02	1.2			Oct_11_13_Cell12	0.926		Oct_11_13_Cell02	0.861
Apr_18_14_Cell13	0.33462		Apr_18_14_Cell03	1.15027			May_16_13_Cell_08	1.29624		May_16_13_Cell_03	1.74737			May_27_14_Cell13	1.25		May_27_14_Cell03	1.76			Dec_05_13_Cell13	0.755		Dec_05_13_Cell03	1.37			Oct_11_13_Cell13	0.628		Oct_11_13_Cell03	0.653
Apr_18_14_Cell14	0.90194		Apr_18_14_Cell04	1.25379			May_16_13_Cell_09	0.76303		May_16_13_Cell_04	0.62147			May_27_14_Cell14	0.948		May_27_14_Cell04	1.19			Dec_05_13_Cell14	0.989		Dec_05_13_Cell04	1.21			Oct_11_13_Cell14	0.317		Oct_11_13_Cell04	0.599
Apr_18_14_Cell15	0.78811		Apr_18_14_Cell05	0.73942			May_16_13_Cell_10	0.2543		May_16_13_Cell_05	1.11138			May_27_14_Cell15	1.48		May_27_14_Cell05	0.333			Dec_05_13_Cell15	0.548		Dec_05_13_Cell05	0.783			Oct_11_13_Cell15	0.578		Oct_11_13_Cell05	0.689
Apr_18_14_Cell16	0.76844		Apr_18_14_Cell06	0.65674			May_16_13_Cell_11	1.11878		May_16_Cell_15	1.50843			May_27_14_Cell16	0.336		May_27_14_Cell07	0.896			Dec_05_13_Cell16	0.898		Dec_05_13_Cell06	0.793			Oct_11_13_Cell16	0.382		Oct_11_13_Cell06	0.678
Apr_18_14_Cell17	0.76845		Apr_18_14_Cell07	0.74162			May_16_13_Cell_12	1.06842		May_16_Cell_16	1.57105			May_27_14_Cell17	1.11		May_27_14_Cell08	1.1			Dec_05_13_Cell17	0.668		Dec_05_13_Cell07	0.756			Oct_11_13_Cell17	0.93		Oct_11_13_Cell07	0.727
Apr_18_14_Cell18	1.31206		Apr_18_14_Cell08	0.81963			May_16_13_Cell_13	1.35359		May_16_Cell_17	1.49392			May_27_14_Cell18	1.19		May_27_14_Cell09	1.32			Dec_05_13_Cell18	1.05		Dec_05_13_Cell08	0.82			Oct_11_13_Cell18	0.721		Oct_11_13_Cell08	0.435
Apr_18_14_Cell19	0.48009		Apr_18_14_Cell09	0.88891			May_16_13_Cell_14	0.56445		May_16_Cell_18	2.75732			May_27_14_Cell19	1.05		May_27_14_Cell10	0.425			Dec_05_13_Cell19	0.923		Dec_05_13_Cell09	1.2			Oct_11_13_Cell19	0.496		Oct_11_13_Cell09	0.828
Apr_18_14_Cell20	0.48651		Apr_18_14_Cell10	0.62538										May_27_14_Cell20	0.567						Dec_05_13_Cell20	0.963		Dec_05_13_Cell10	0.603			Oct_11_13_Cell20	0.365		Oct_11_13_Cell10	0.853

## Sheet: PooledDatamEPSC20samp
CON	Cell Name	Amplitude (pA)	Mean		TTX	Cell Name	Amplitude (pA)	Mean
	D0512003	9.36	13.8548			D0512008	23	16.6917
	D0512004	24.8				D0512009	12.8
	D0512005	9.4				D0512010	11.9
	D0512006	11.2				D0512011	11.7
	D0512007	15.5				D0512012	19.3
	D0512017	11.3				D0512013	13.8
	D0512018	7.2				D0512015	24.2
	E0519000	14.5				D0512016	20
	E0519001	18.7				E0519005	11.7
	E0519002	11.5				E0519006	14.7
	E0519003	14.6				E0519007	16.1
	E0519004	11.6				E0519008	18.9
	E0519010	12.1				E0519013	22.2
	E0519011	13.3				E0519014	14.8
	E0519012	14.7				E0519015	20
	E0519016	16.6				E0519019	14.2
	E0519017	13.5				E0519020	21.2
	E0414000	10.4				E0414002	13.4
	E0414001	15.8				E0414003	13.3
	E0414004	11.7				E0414007	12.6
	E0414005	7.3				E0414008	13.4
	E0414006	31.8				E0414009	27
	E0414012	11.8				E0414010	14.2
						E0414013	16.2

## Sheet: PoolDataGluA2area
CON	Experiment	Area (mm2)	Mean		TTX	Experiment	Area (mm2)	Mean
	2025-04-18	0.82232	0.82835			2025-04-18	1.43387	0.97657
	2025-04-18	0.6787				2025-04-18	0.54575
	2025-04-18	0.33462				2025-04-18	1.15027
	2025-04-18	0.90194				2025-04-18	1.25379
	2025-04-18	0.78811				2025-04-18	0.73942
	2025-04-18	0.76844				2025-04-18	0.65674
	2025-04-18	0.76845				2025-04-18	0.74162
	2025-04-18	1.31206				2025-04-18	0.81963
	2025-04-18	0.48009				2025-04-18	0.88891
	2025-04-18	0.48651				2025-04-18	0.62538
	2025-05-16	0.66695				2025-05-16	0.27927
	2025-05-16	1.07733				2025-05-16	1.71469
	2025-05-16	1.29624				2025-05-16	1.74737
	2025-05-16	0.76303				2025-05-16	0.62147
	2025-05-16	0.2543				2025-05-16	1.11138
	2025-05-16	1.11878				2025-05-16	1.50843
	2025-05-16	1.06842				2025-05-16	1.57105
	2025-05-16	1.35359				2025-05-16	1.49392
	2025-05-16	0.56445				2025-05-16	2.75732
	2025-05-27	1.22744				2025-05-27	0.66613
	2025-05-27	1.2884				2025-05-27	0.87175
	2025-05-27	1.25497				2025-05-27	1.75535
	2025-05-27	0.94845				2025-05-27	1.19205
	2025-05-27	1.48219				2025-05-27	0.33283
	2025-05-27	0.33623				2025-05-27	0.896
	2025-05-27	1.10534				2025-05-27	1.10095
	2025-05-27	1.19057				2025-05-27	1.32435
	2025-05-27	1.05267				2025-05-27	0.42476
	2025-05-27	0.56654				2025-12-05	0.79
	2025-12-05	1.04				2025-12-05	1.2
	2025-12-05	1.02				2025-12-05	1.37
	2025-12-05	0.755				2025-12-05	1.21
	2025-12-05	0.989				2025-12-05	0.783
	2025-12-05	0.548				2025-12-05	0.793
	2025-12-05	0.898				2025-12-05	0.756
	2025-12-05	0.668				2025-12-05	0.82
	2025-12-05	1.05				2025-12-05	1.2
	2025-12-05	0.923				2025-12-05	0.603
	2025-12-05	0.963				2025-10-11	0.803
	2025-10-11	0.435				2025-10-11	0.861
	2025-10-11	0.926				2025-10-11	0.653
	2025-10-11	0.628				2025-10-11	0.599
	2025-10-11	0.317				2025-10-11	0.689
	2025-10-11	0.578				2025-10-11	0.678
	2025-10-11	0.382				2025-10-11	0.727
	2025-10-11	0.93				2025-10-11	0.435
	2025-10-11	0.721				2025-10-11	0.828
	2025-10-11	0.496				2025-10-11	0.853
	2025-10-11	0.365
